# Supplementary material for: Validation of system usability scale as a usability metric to evaluate voice user interfaces
Source: PeerJ Comput Sci. 2024 Feb 29;10:e1918. doi: 10.7717/peerj-cs.1918 (PMC10909179; doi:10.7717/peerj-cs.1918)
Supplement: Supplemental Information 1 [file peerj-cs-10-1918-s001.xlsx]

## Sheet: Alexa_Result
Participant ID	SUS1	SUS2	SUS3	SUS4	SUS5	SUS6	SUS7	SUS8	SUS9	SUS10	X (Sum of odd nr. Q)	Y(Sum of even nr. Q)	X0 (X-5)	Y0(25-Y)	SUS (X0+Y0*2.5)
P1	4	3	2	2	3	4	5	4	4	3	18	16	13	9	55
P2	4	3	4	2	3	3	5	4	4	3	20	15	15	10	62.5
P3	3	3	4	4	3	4	2	4	2	4	14	19	9	6	37.5
P4	5	4	4	2	5	3	4	2	2	5	20	16	15	9	60
P5	1	1	3	2	4	2	5	2	4	3	17	10	12	15	67.5
P6	5	2	5	5	4	2	3	2	4	4	21	15	16	10	65
P7	5	5	2	3	4	2	3	2	3	5	17	17	12	8	50
P8	3	5	5	3	4	3	2	3	3	2	17	16	12	9	52.5
P9	2	3	5	3	4	5	2	4	5	2	18	17	13	8	52.5
P10	2	2	4	2	3	4	2	5	2	3	13	16	8	9	42.5
P11	3	2	2	5	2	4	1	3	4	4	12	18	7	7	35
P12	4	4	3	4	4	3	5	3	3	4	19	18	14	7	52.5
P13	2	3	1	4	5	5	1	4	5	4	14	20	9	5	35
P14	5	3	5	3	2	2	3	2	4	5	19	15	14	10	60
P15	4	4	4	5	1	4	4	1	4	3	17	17	12	8	50
P16	3	5	2	2	5	4	3	1	4	2	17	14	12	11	57.5
Mean (SUS)	3.4375	3.25	3.4375	3.1875	3.5	3.375	3.125	2.875	3.5625	3.5

## Sheet: GoogleHome_Result
Participant ID	SUS1	SUS2	SUS3	SUS4	SUS5	SUS6	SUS7	SUS8	SUS9	SUS10	X (Sum of odd nr. Q)	Y(Sum of even nr. Q)	X0 (X-5)	Y0(25-Y)	SUS (X0+Y0*2.5)
P1	4	2	4	4	4	3	2	4	3	4	17	17	12	8	50
P2	4	2	2	4	4	4	2	3	3	4	15	17	10	8	45
P3	2	2	2	5	4	3	3	5	2	2	13	17	8	8	40
P4	5	5	2	3	2	4	3	5	2	3	14	20	9	5	35
P5	4	4	5	4	5	5	3	1	5	4	22	18	17	7	60
P6	5	2	5	3	1	2	4	1	4	4	19	12	14	13	67.5
P7	3	1	3	2	4	3	4	3	4	1	18	10	13	15	70
P8	1	3	1	5	3	4	1	5	5	1	11	18	6	7	32.5
P9	3	3	4	4	5	3	2	4	5	4	19	18	14	7	52.5
P10	2	3	1	4	4	2	1	4	2	5	10	18	5	7	30
P11	1	1	3	4	4	5	2	3	4	1	14	14	9	11	50
P12	4	4	5	5	4	5	4	3	3	5	20	22	15	3	45
P13	5	5	2	3	4	5	5	3	3	4	19	20	14	5	47.5
P14	2	2	2	3	1	4	3	5	2	3	10	17	5	8	32.5
P15	2	1	4	2	1	4	1	3	4	5	12	15	7	10	42.5
P16	3	5	4	4	1	3	5	2	5	5	18	19	13	6	47.5
Mean(SUS)	3.125	2.8125	3.0625	3.6875	3.1875	3.6875	2.8125	3.375	3.5	3.4375

## Sheet: Sheet3
1	3.4375	3.125
2	3.25	2.8125
3	3.4375	3.0625
4	3.1875	3.6875
5	3.5	3.1875
6	3.375	3.6875
7	3.125	2.8125
8	2.875	3.375
9	3.5625	3.5
10	3.5	3.4375
